# Supplementary material for: Lipid-bilayer-mimicking solid-state structures of Cu(ii) and Ni(ii) with l-tryptophan and l-tyrosine Schiff base derivatives
Source: Royal Society of Chemistry journal article supplement (doi:10.1039/c0ce00986e), 2011-01-01
Supplement: c0ce00986e.pdf [file c0ce00986e.pdf]

# Lipid-Bilayer-Mimicking Solid-State Structures of Cu(II) and Ni(II) with *L*-Tryptophan and *L*-Tyrosine Schiff Base Derivatives†

Siu Yee New, Xuan Wu, Shi-Qiang Bai, Lip Lin Koh, T. S. Andy Hor\* and Feng Xue\*

## Electronic Supplementary Information

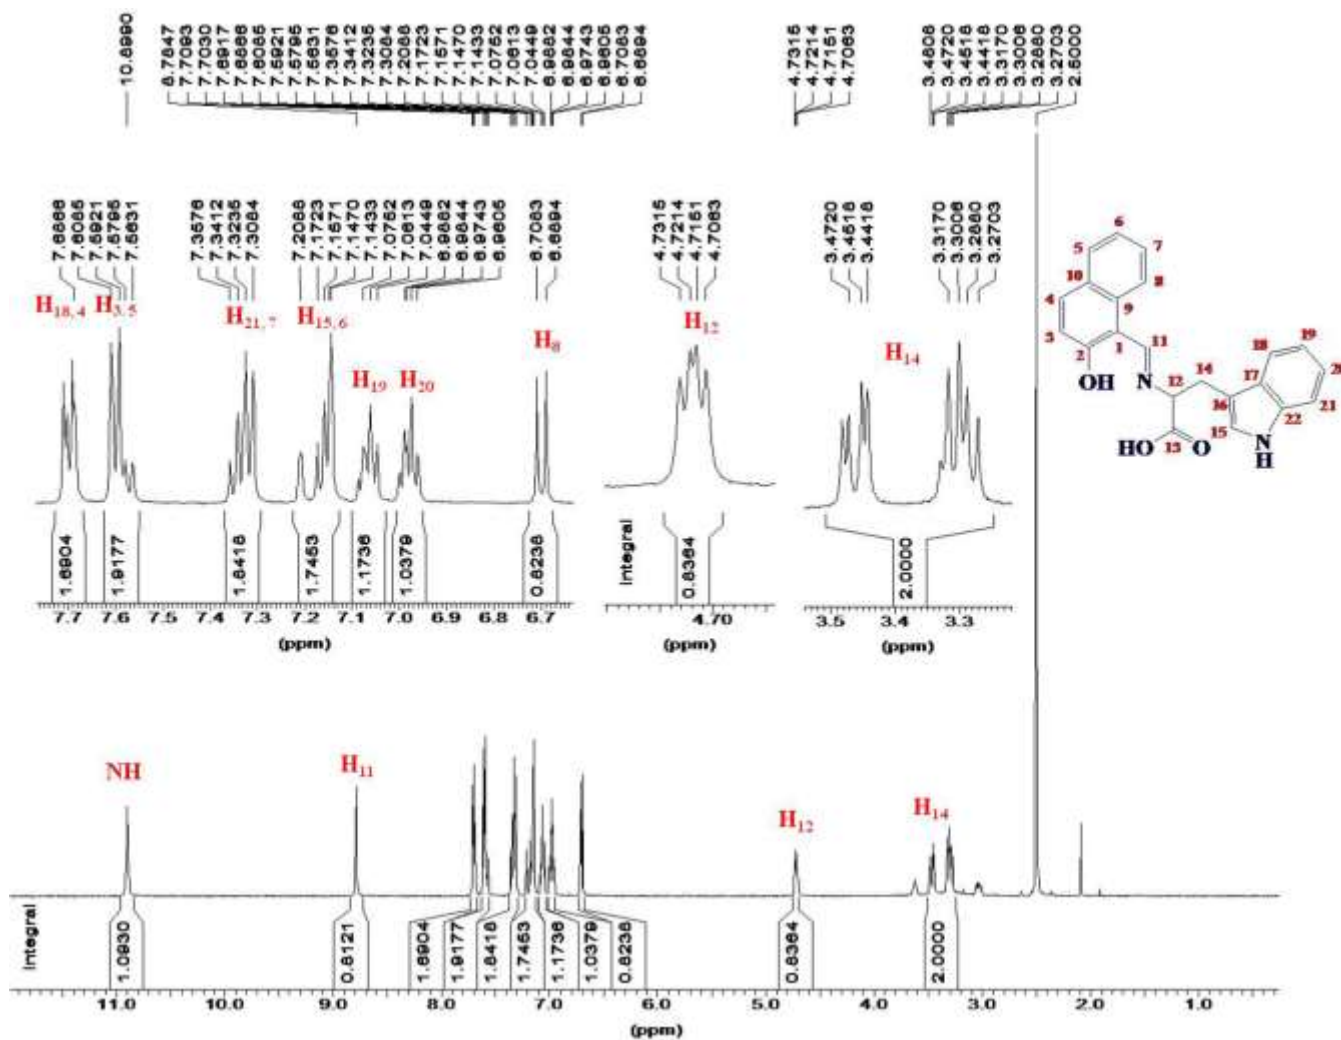

Fig. S1  $^1\text{H}$  NMR of  $\text{H}_2\text{WNap}$  ligand.

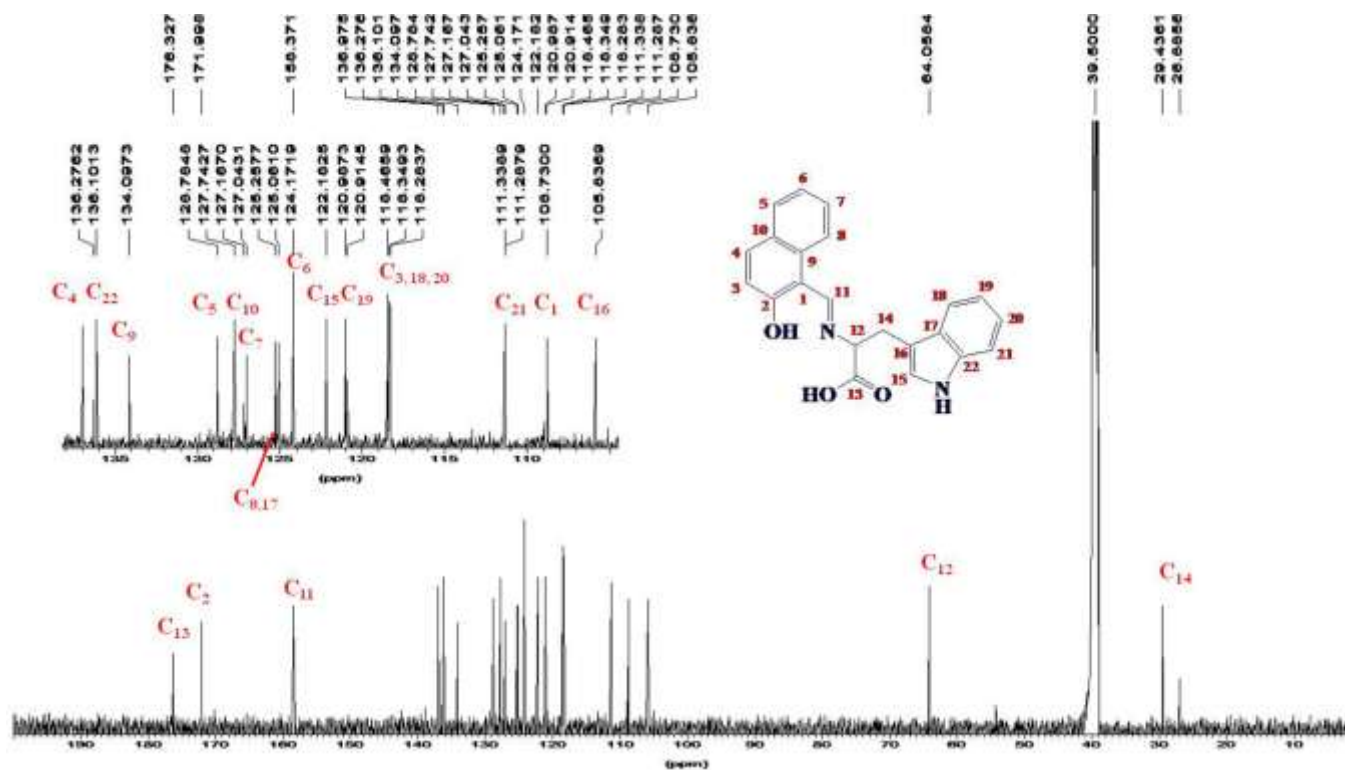

Fig. S2  $^{13}\text{C}$  NMR of  $\text{H}_2\text{WNap}$  ligand.

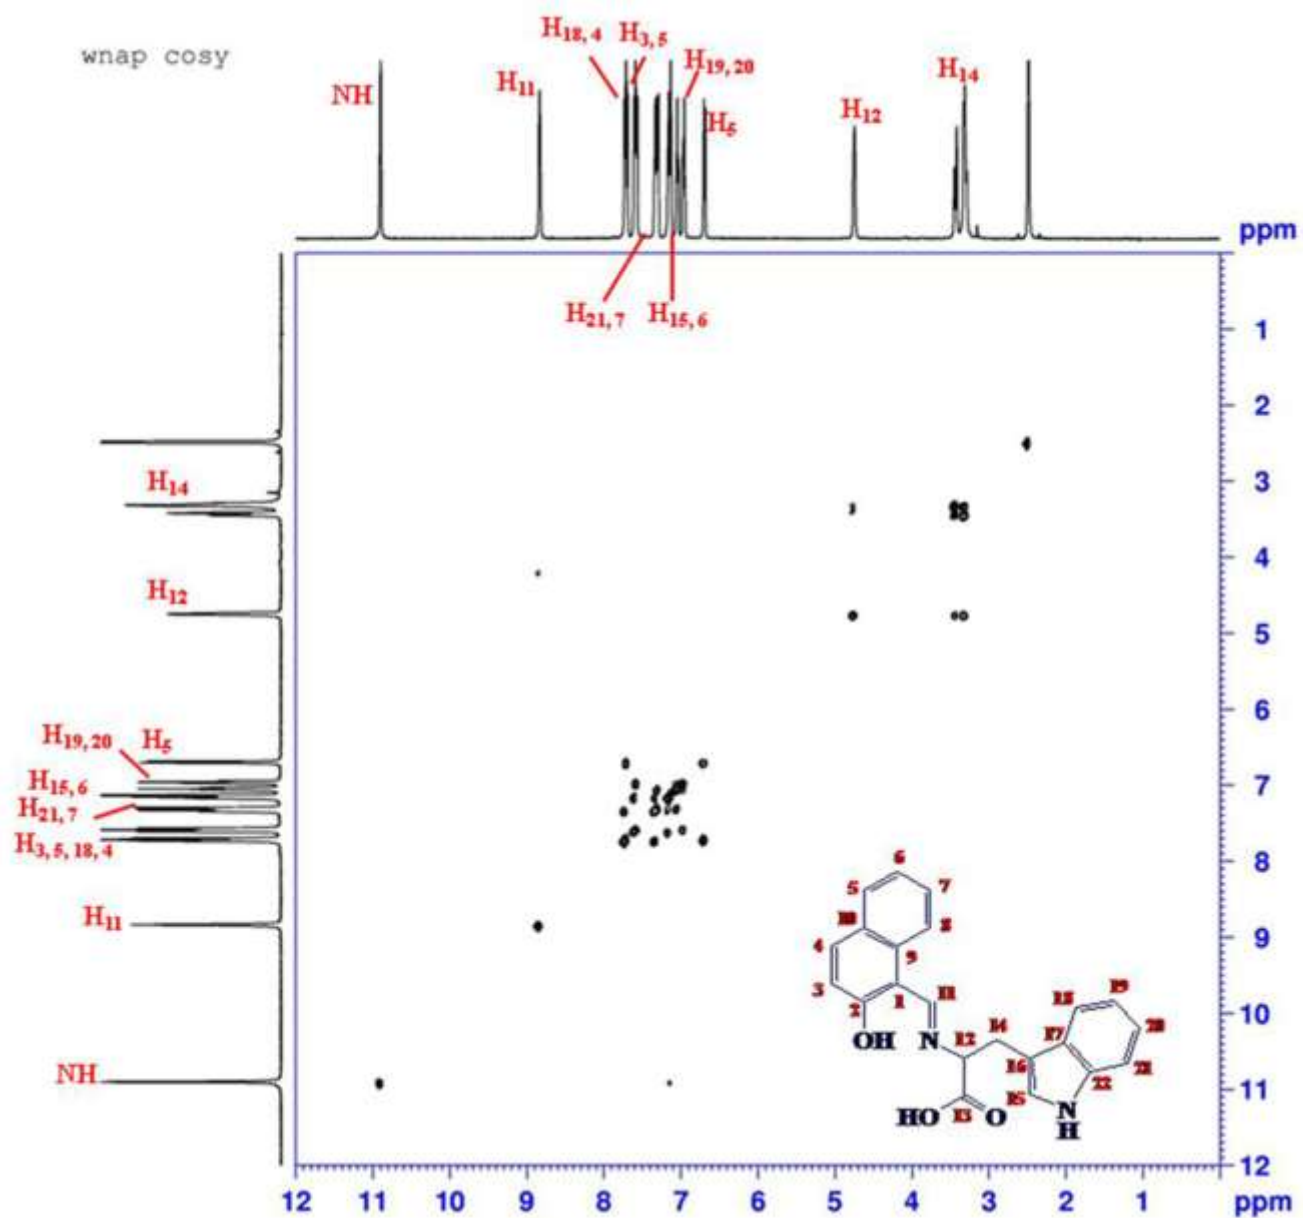

Fig. S3COSY-NMR of H<sub>2</sub>WNap ligand.

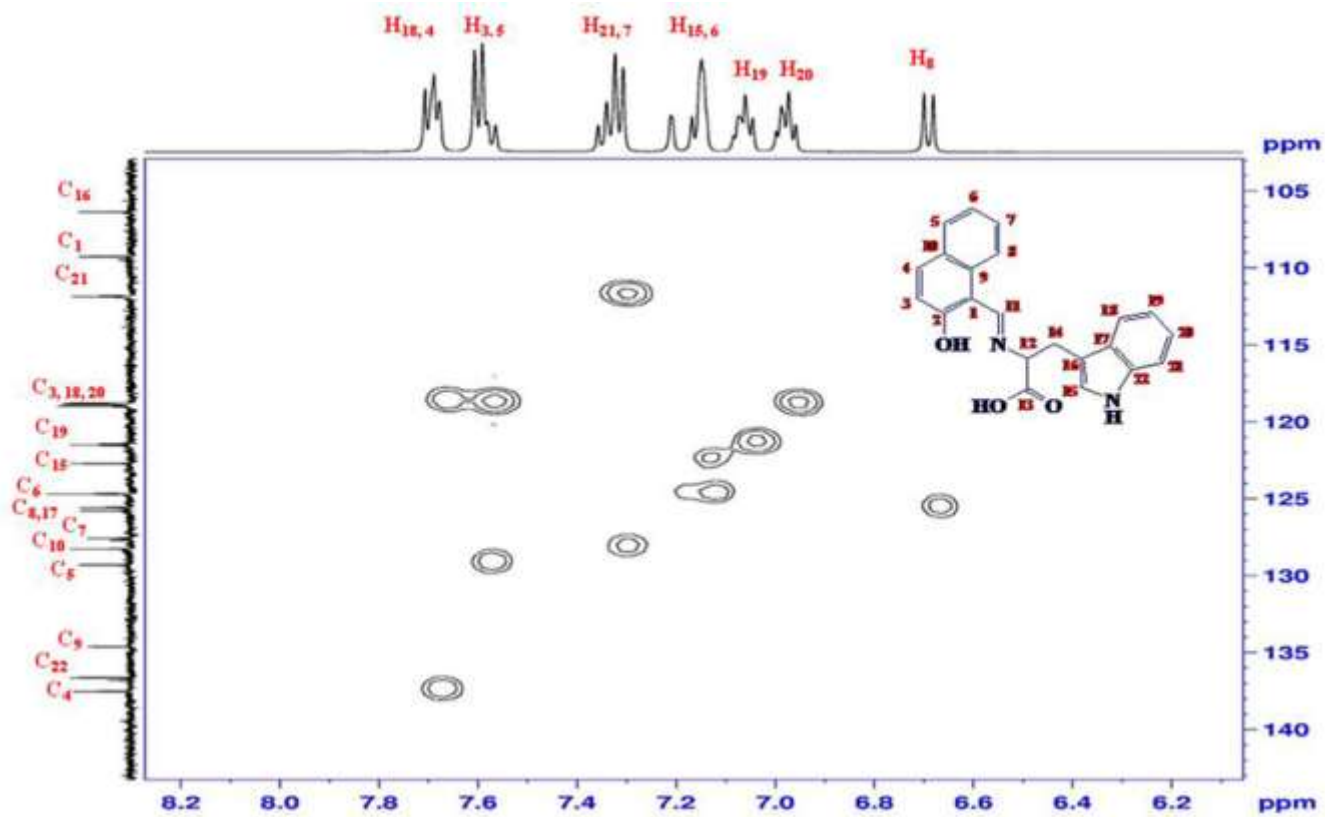

Fig. S4  $^1\text{H}$ - $^{13}\text{C}$  HMQC NMR of  $\text{H}_2\text{WNap}$  ligand.

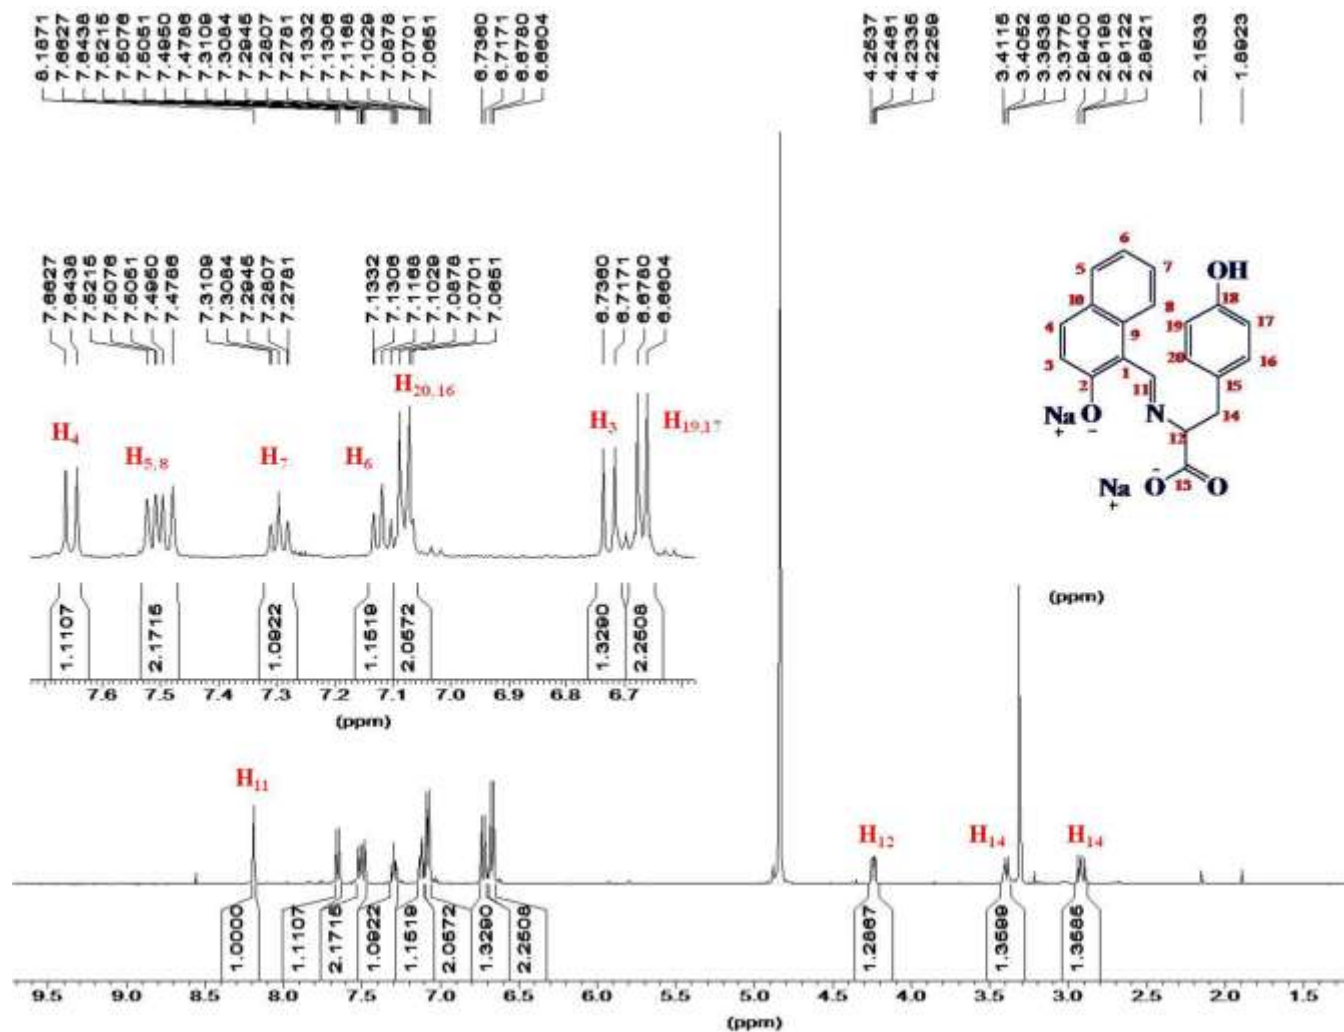

Fig. S5 <sup>1</sup>H NMR of Na<sub>2</sub>YNap ligand.

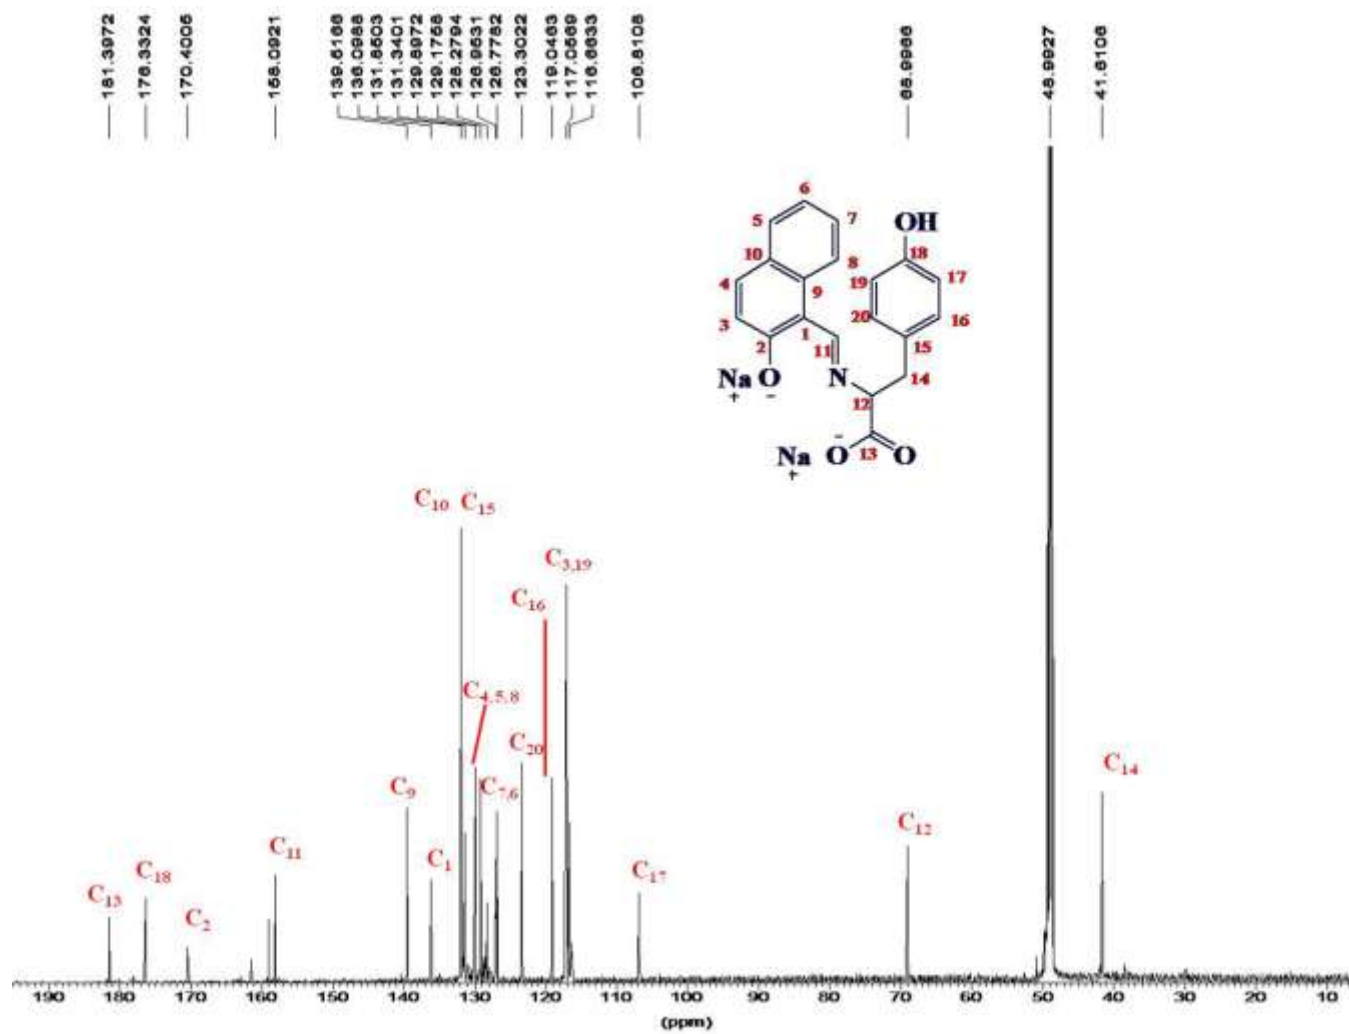

Fig. S6  $^{13}\text{C}$  NMR of  $\text{Na}_2\text{YNap}$  ligand.

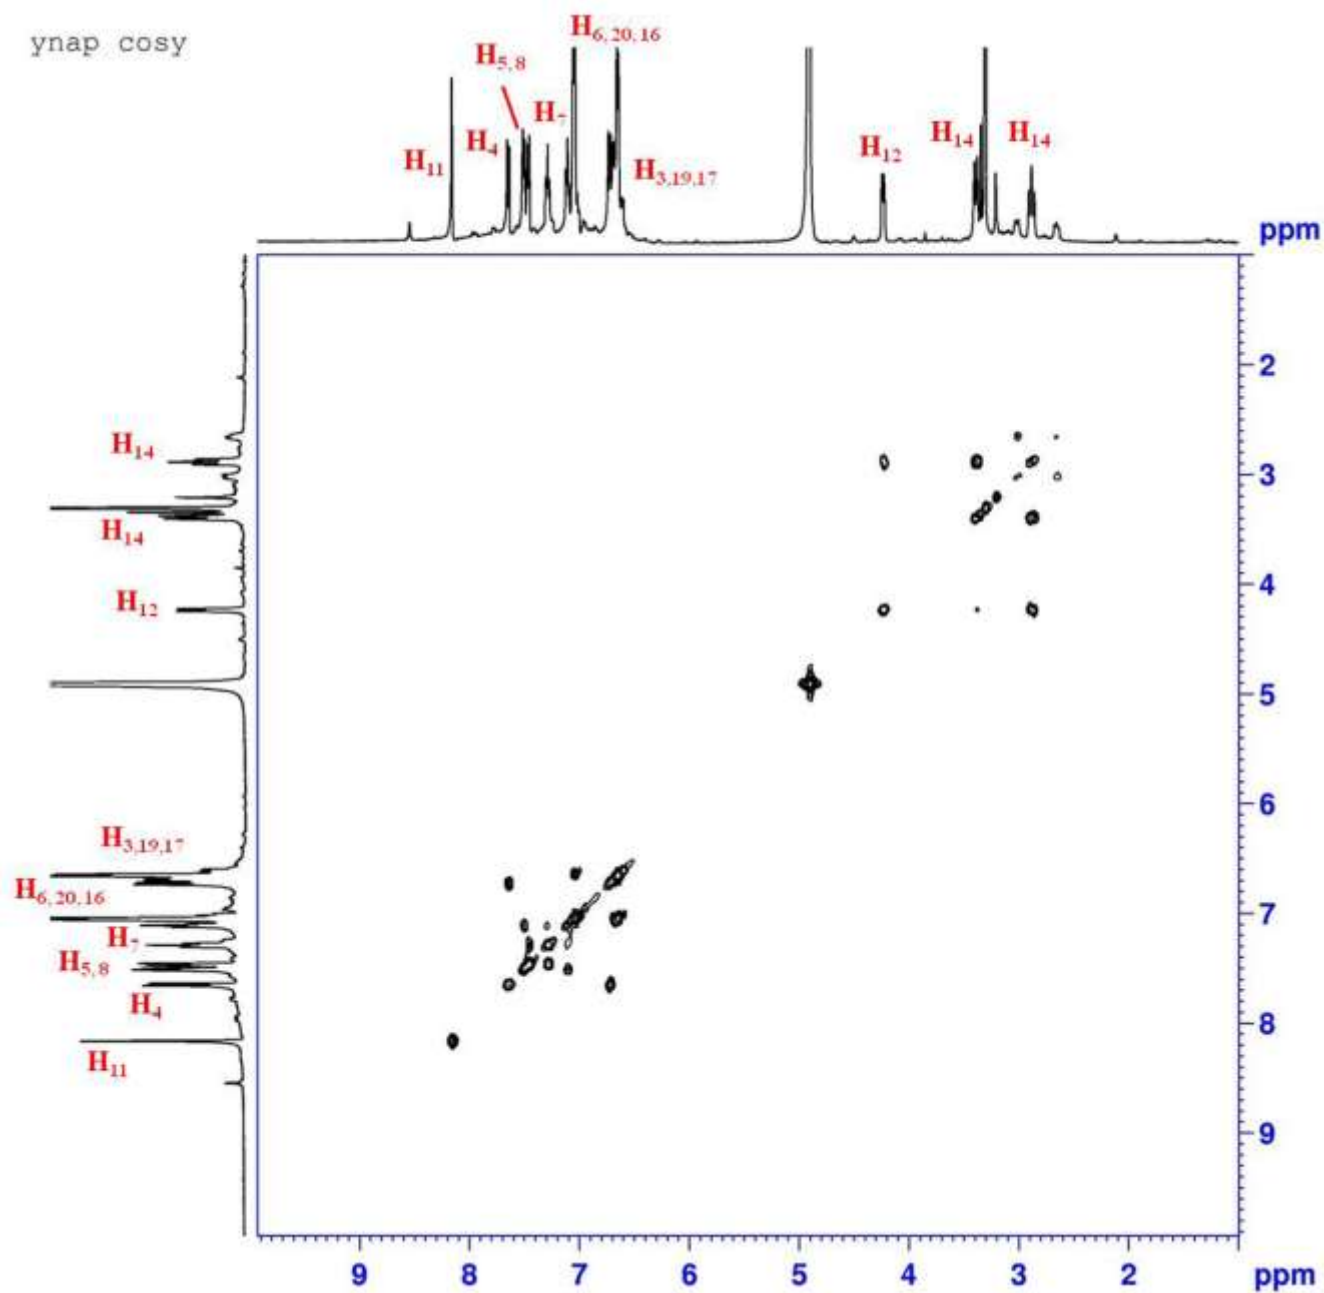

Fig. S7COSY-NMR of Na<sub>2</sub>YNap ligand.

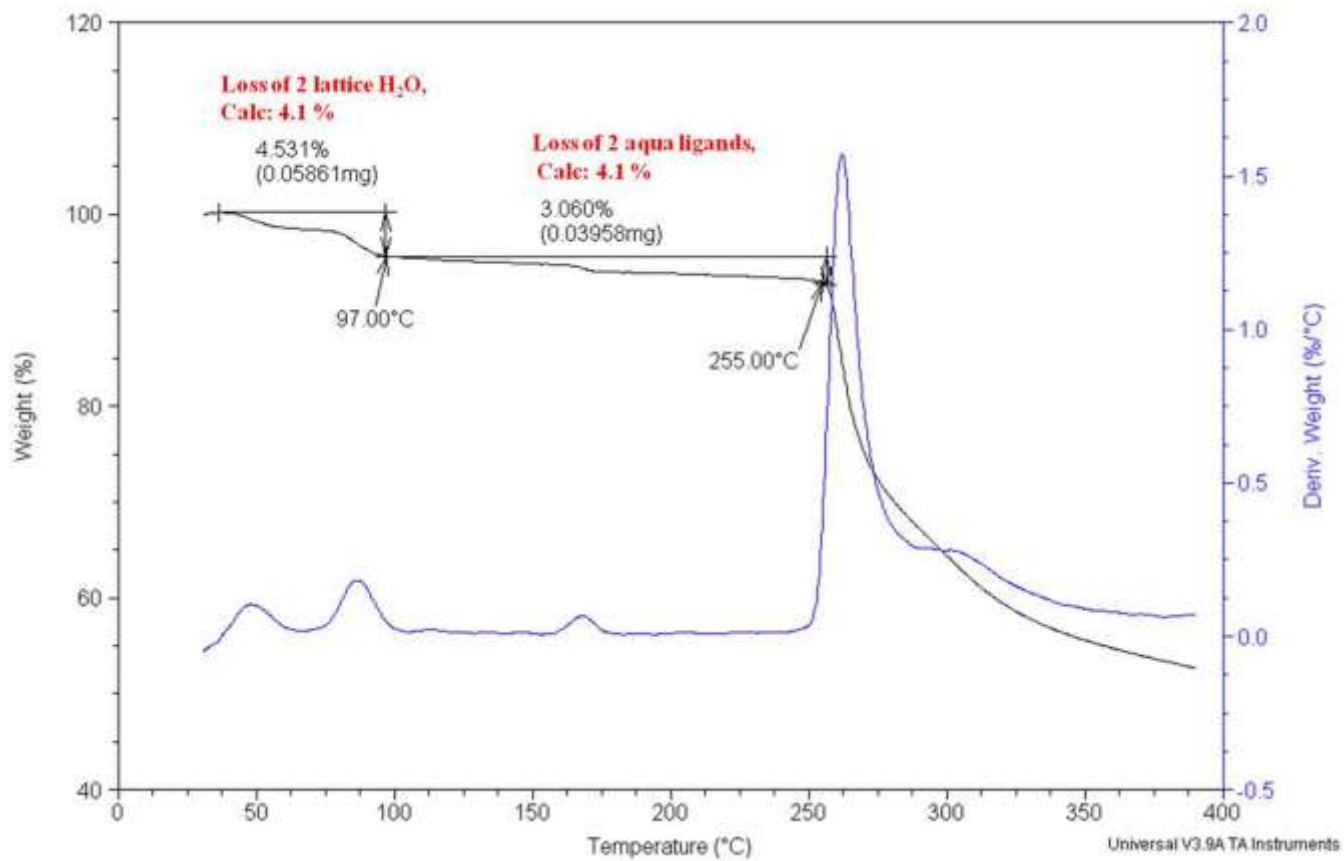

Fig. S8 TGA of [Cu<sub>2</sub>(WNap)<sub>2</sub>(H<sub>2</sub>O)<sub>2</sub>] $\cdot$ 2H<sub>2</sub>O, 1.



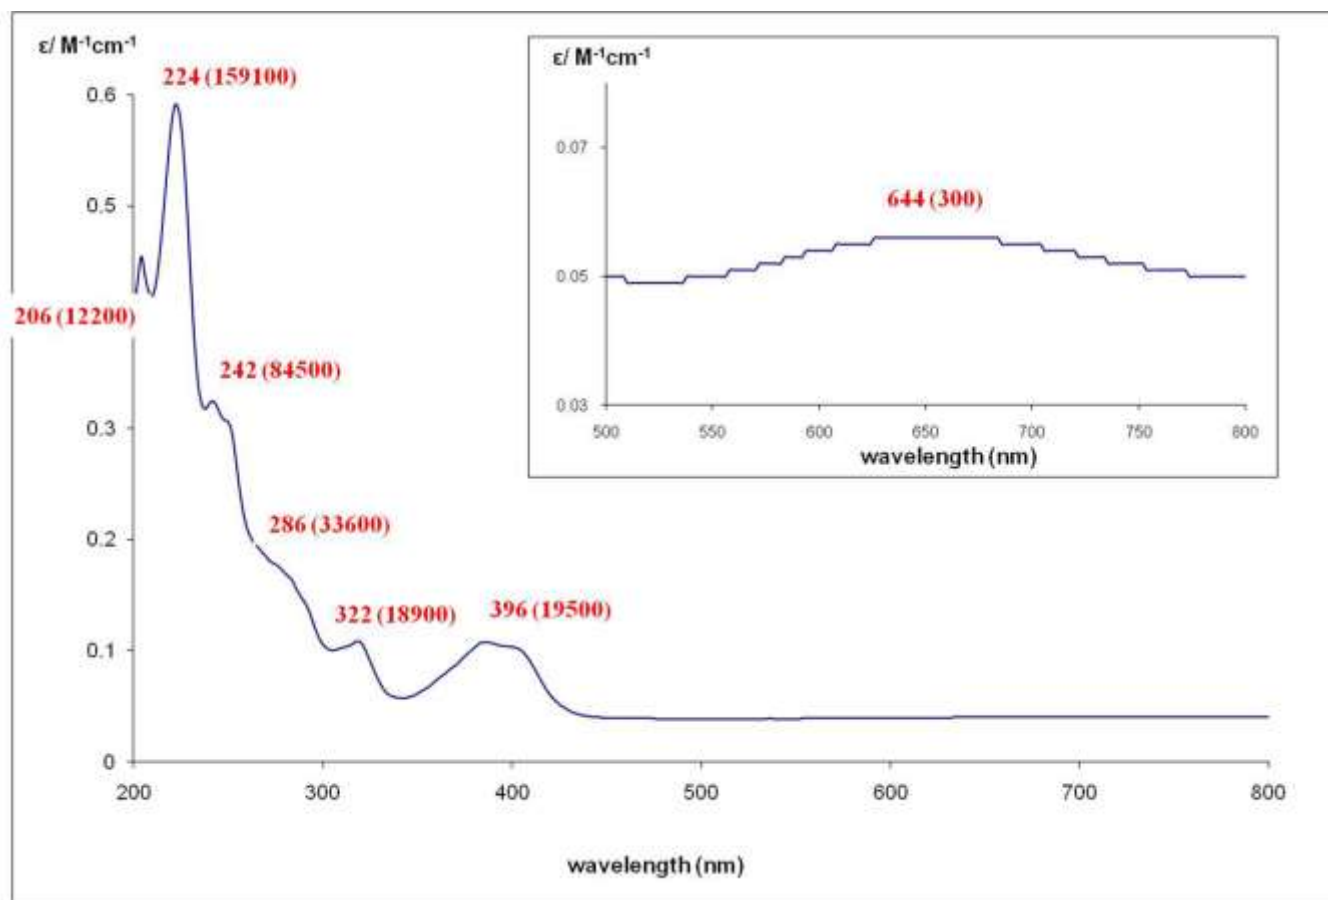

**Fig. S9** UV-visible spectrum of  $[\text{Cu}_2(\text{WNap})_2(\text{H}_2\text{O})_2] \cdot 2\text{H}_2\text{O}$ , 1.

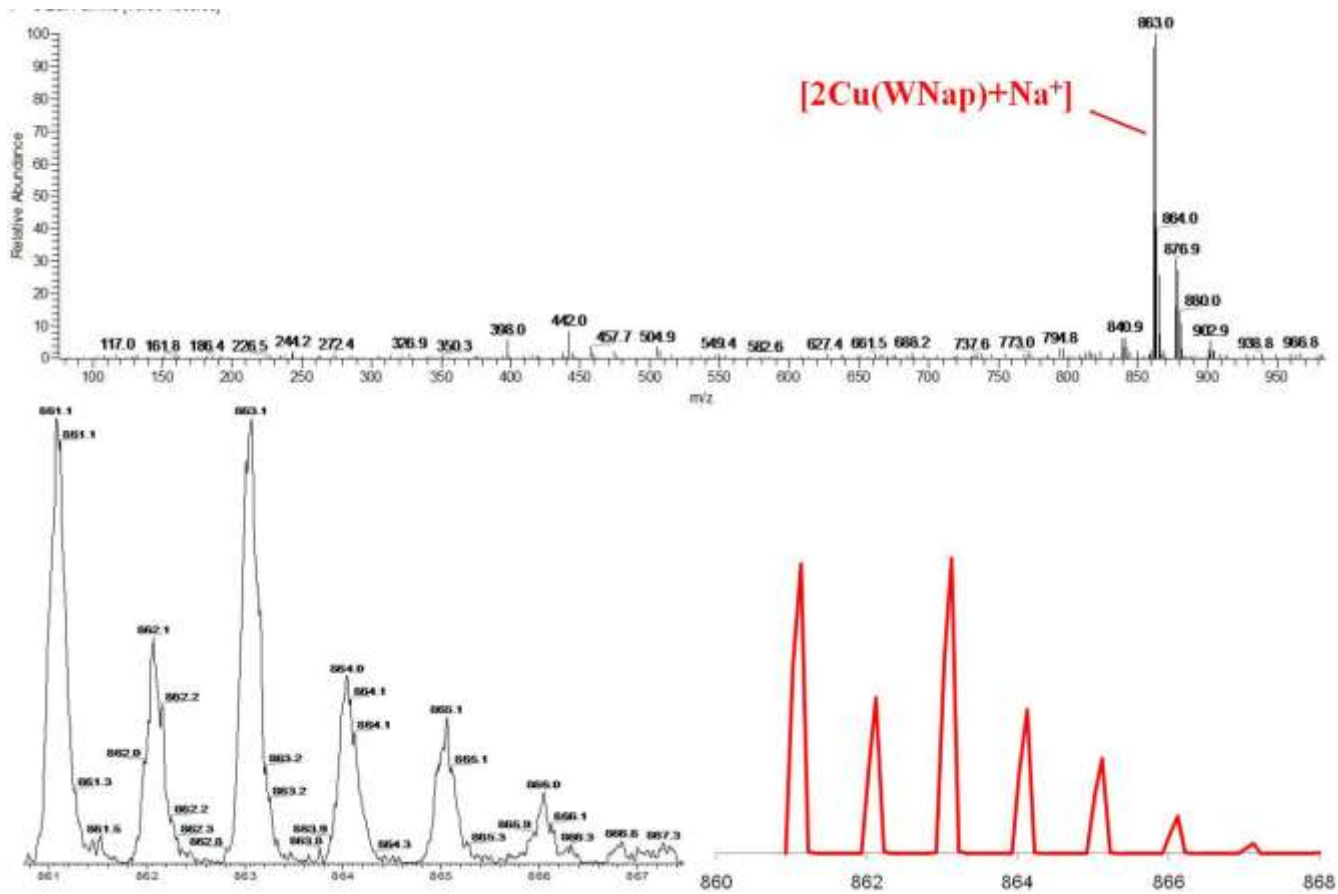

**Fig. S10** Positive mode ESI spectrum of  $[\text{Cu}_2(\text{WNap})_2(\text{H}_2\text{O})_2]\cdot 2\text{H}_2\text{O}$ , **1** and its simulated isotopic spectrum.

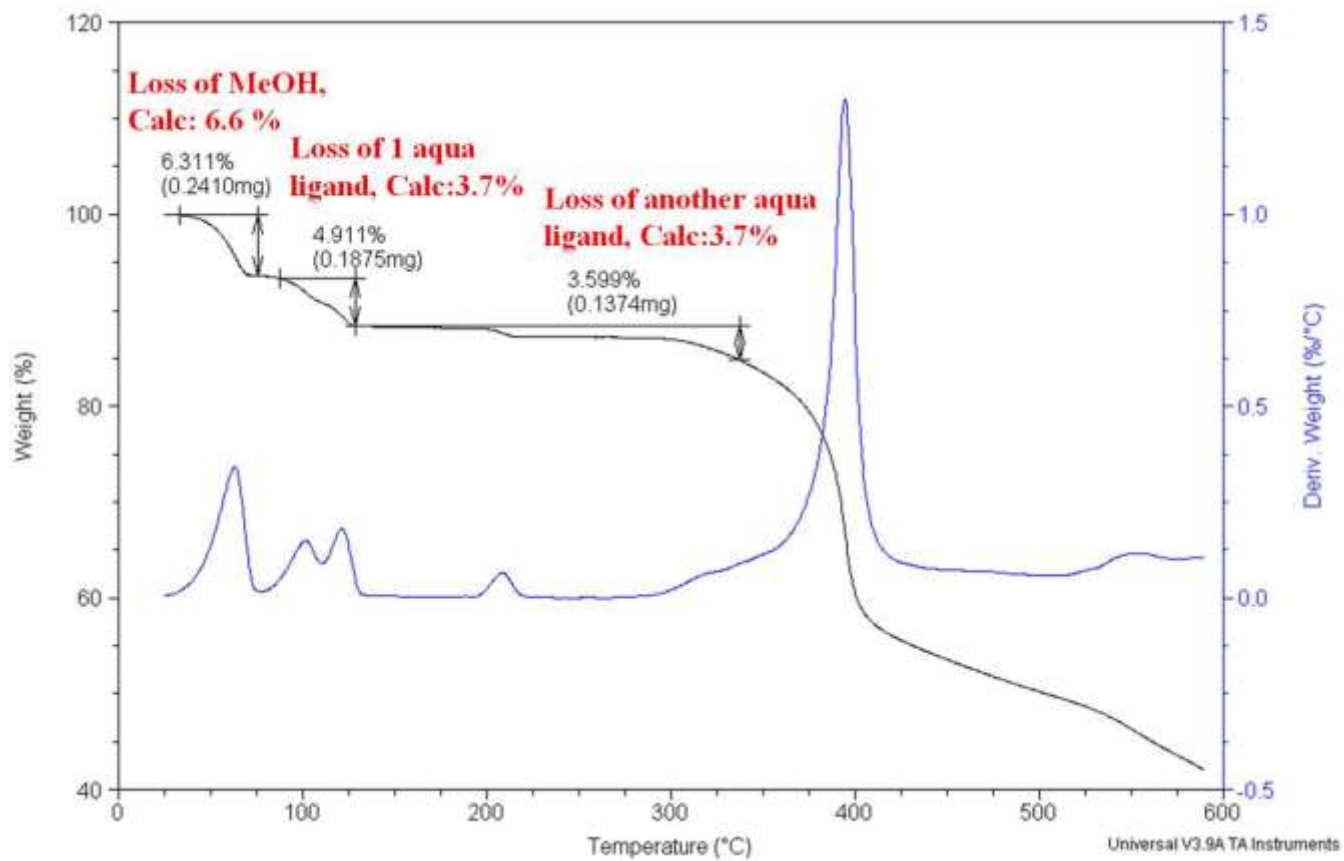

Fig. S11 TGA of  $[\text{Ni}(\text{WNap})(\text{MeOH})(\text{H}_2\text{O})_2]\cdot\text{H}_2\text{O}$ , 2.

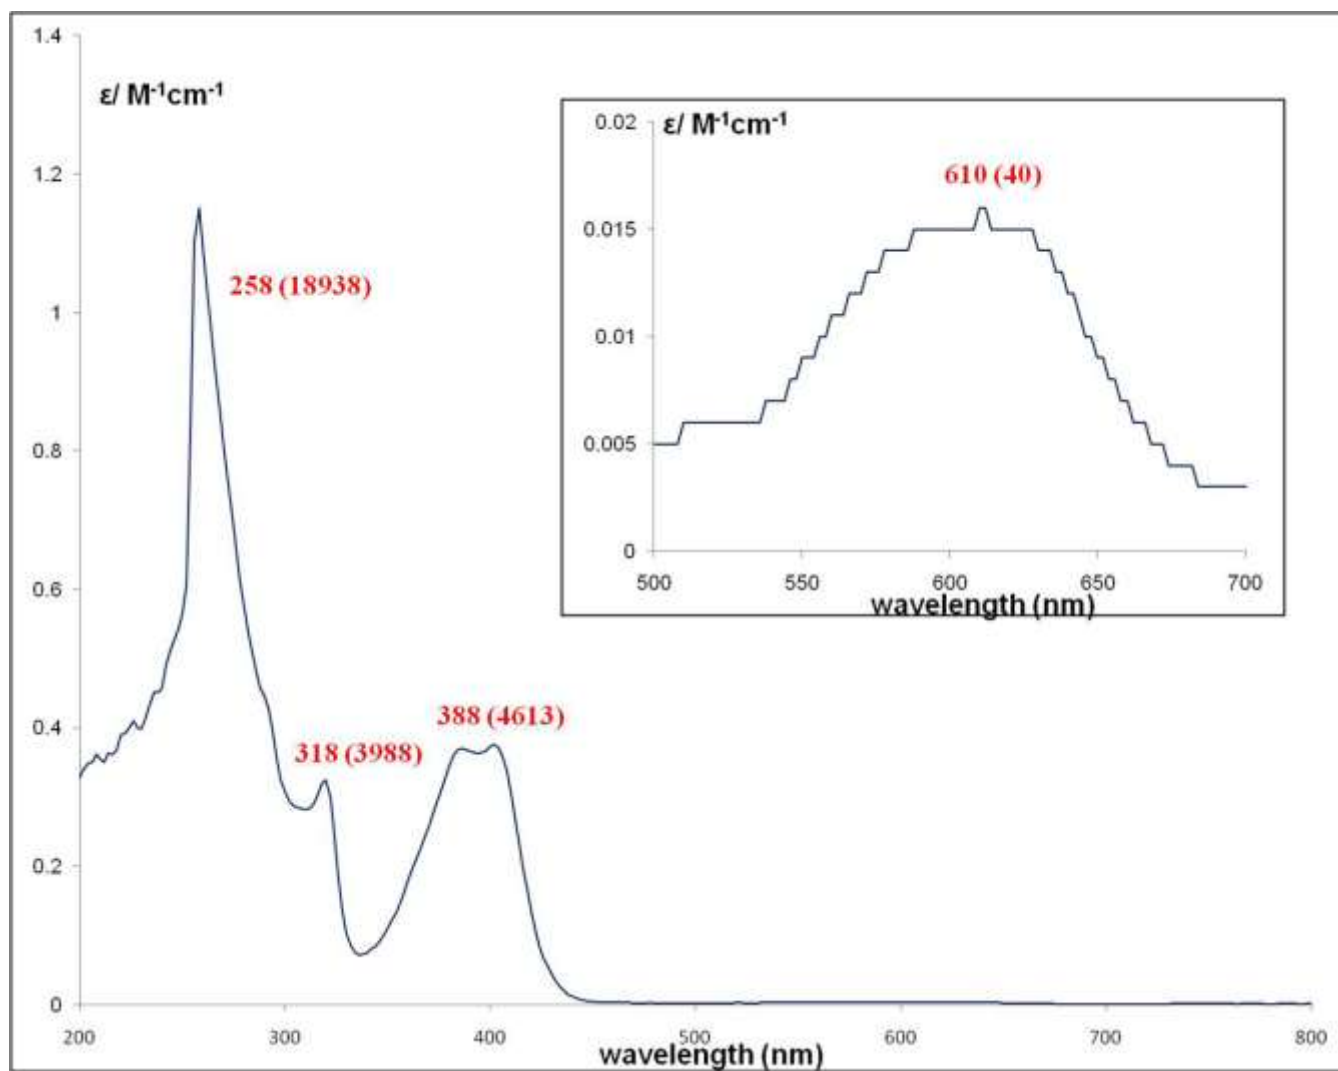

**Fig. S12** UV-visible spectrum of  $[\text{Ni}(\text{WNap})(\text{MeOH})(\text{H}_2\text{O})_2] \cdot \text{H}_2\text{O}$ , 2.

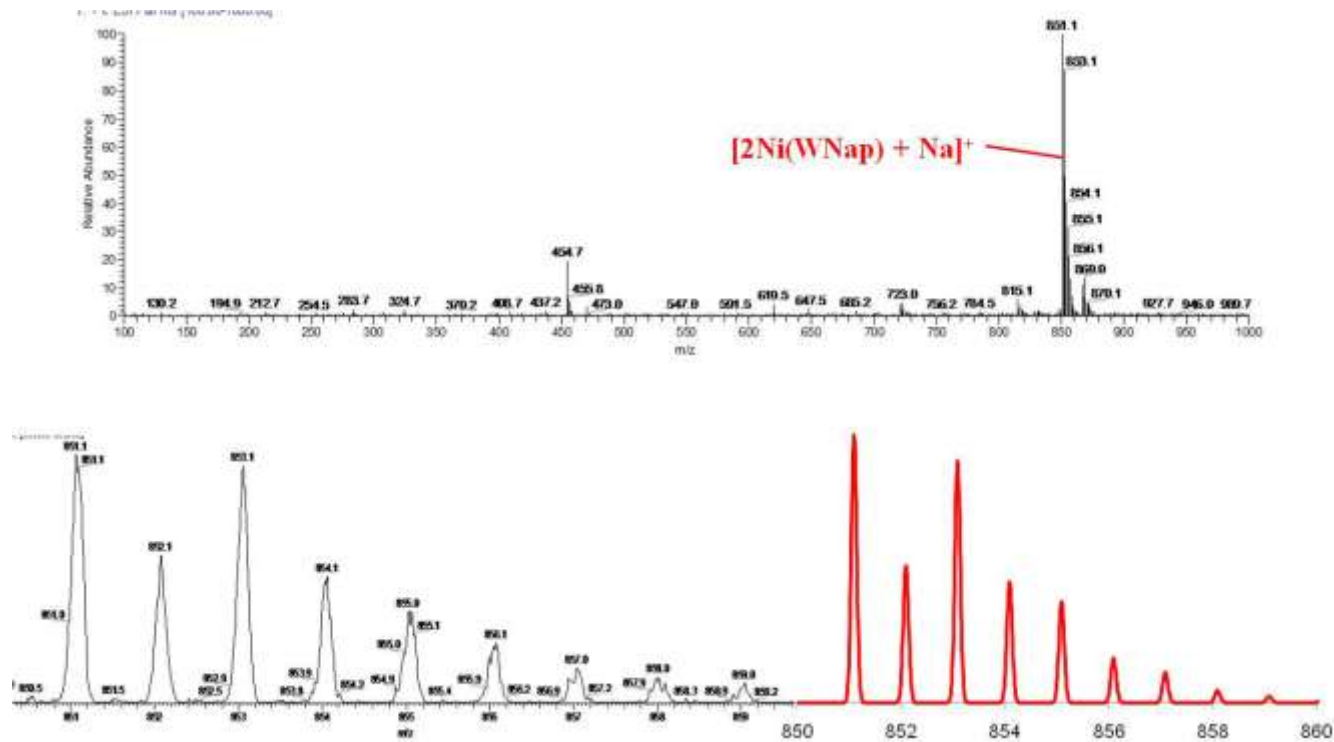

**Fig. S13** Positive mode ESI spectrum of  $[\text{Ni}(\text{WNap})(\text{MeOH})(\text{H}_2\text{O})_2] \cdot \text{H}_2\text{O}$ , **2** and its simulated isotopic spectrum.

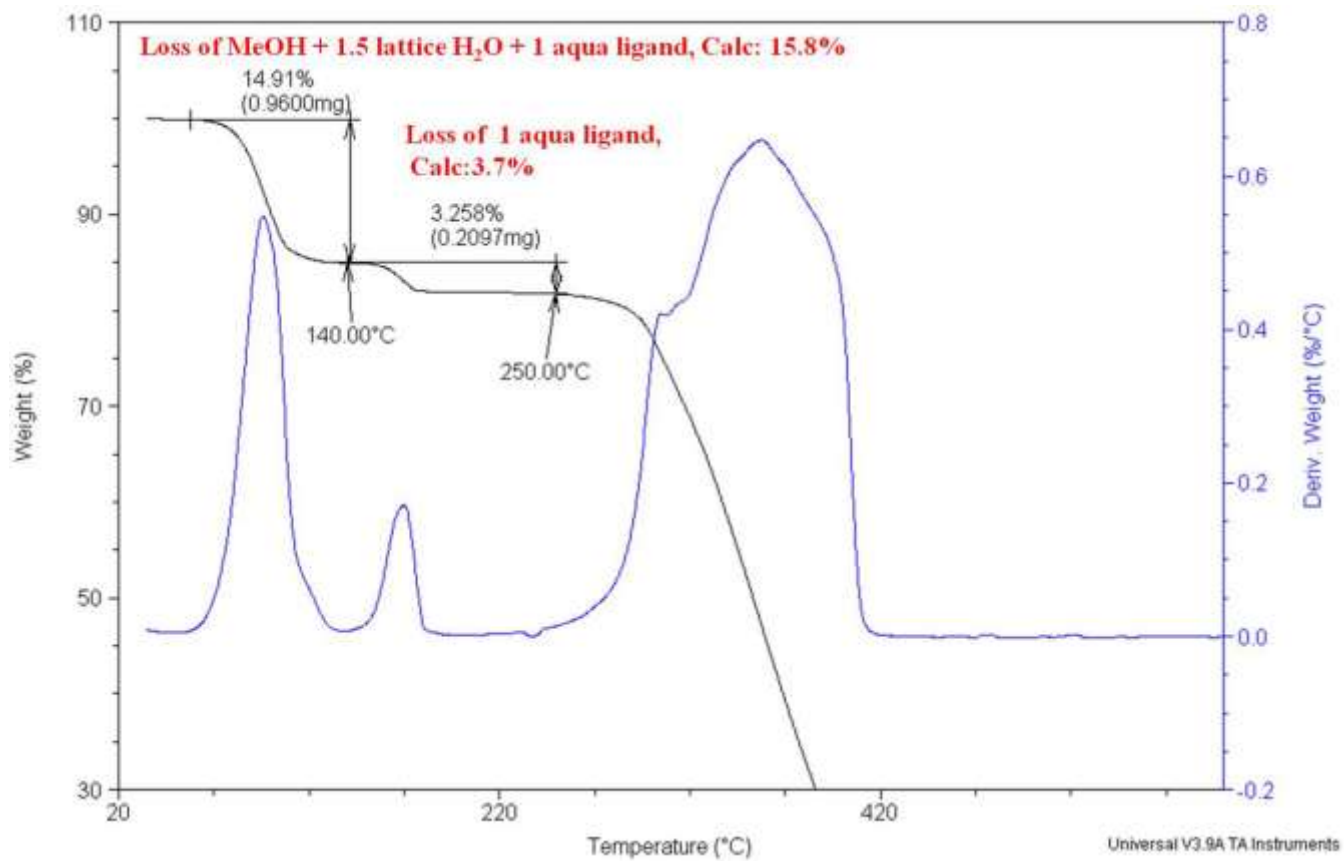

Fig. S14 TGA of [Ni(YNap)(H<sub>2</sub>O)<sub>2</sub>(MeOH)]·1.5H<sub>2</sub>O, 3.

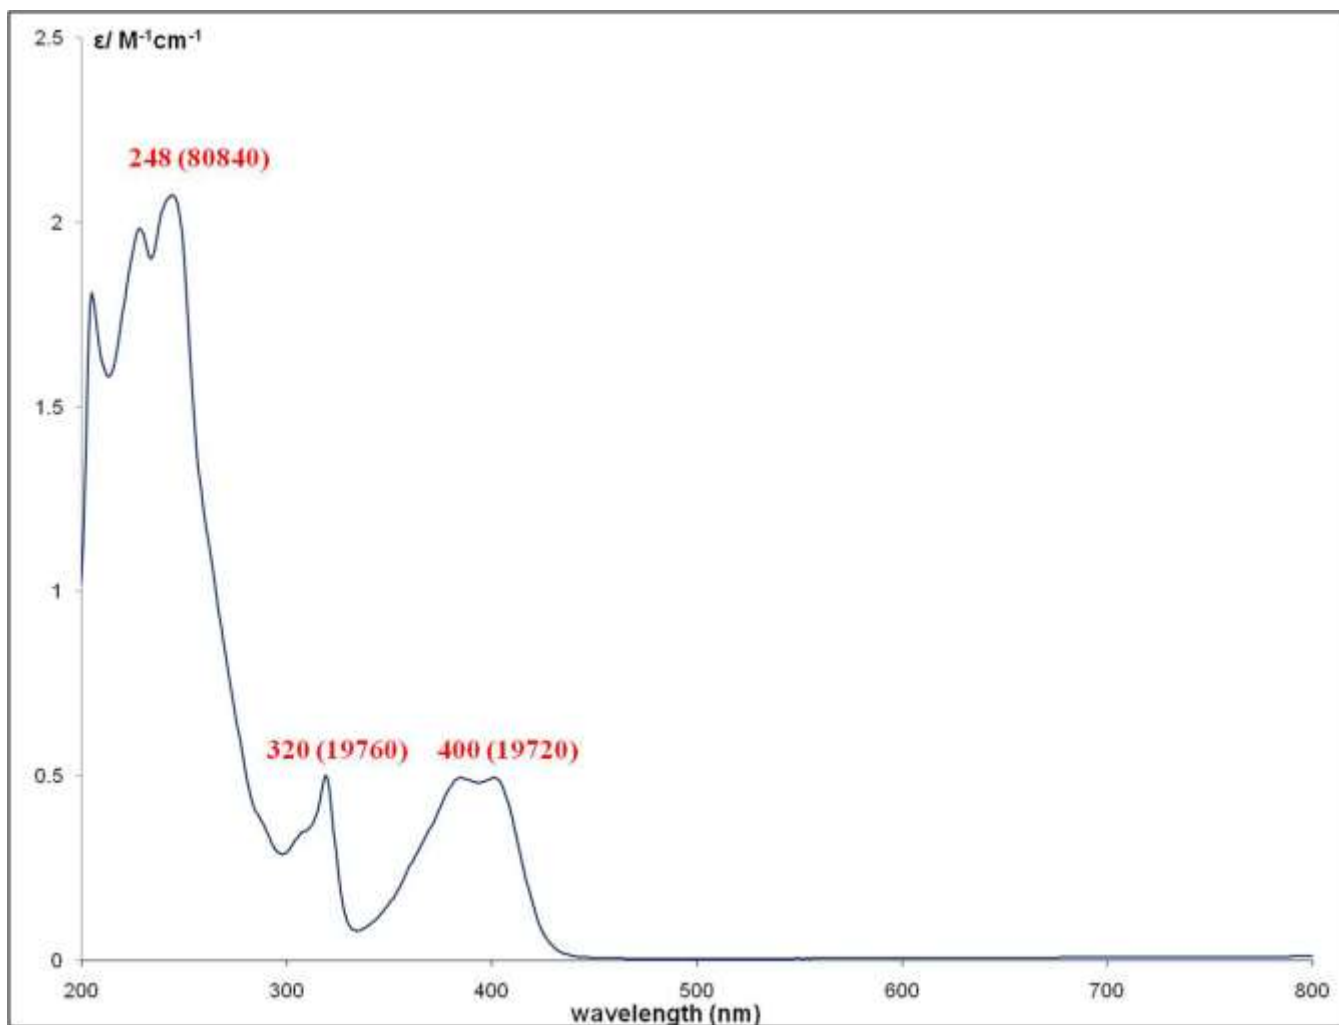

**Fig. S15** UV-visible spectrum of  $[\text{Ni}(\text{YNap})(\text{H}_2\text{O})_2(\text{MeOH})] \cdot 1.5\text{H}_2\text{O}$ , 3.

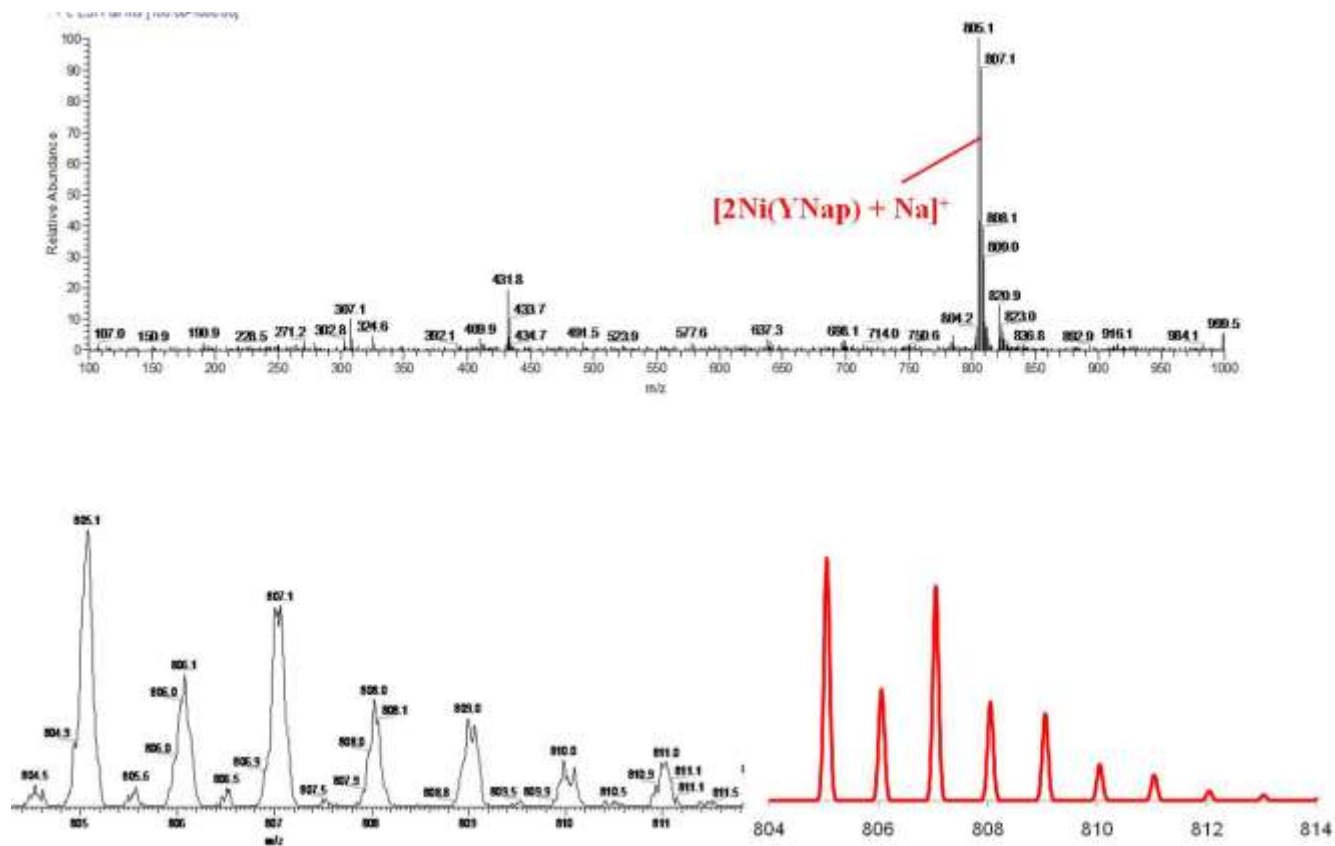

Fig. S16 Positive mode ESI spectrum of  $[\text{Ni}(\text{YNap})(\text{H}_2\text{O})_2(\text{MeOH})] \cdot 1.5\text{H}_2\text{O}$ , **3** and its simulated isotopic spectrum.
